# Supplementary material for: Transformation of threshold volatile switching to quantum point contact originated nonvolatile switching in graphene interface controlled memory devices
Source: Royal Society of Chemistry journal article supplement (doi:10.1039/c9na00409b), 2019-01-01
Supplement: c9na00409b1.pdf [file c9na00409b1.pdf]

## Supporting Information

### Transformation of Threshold Volatile Switching to Quantum Point Contact Originated Nonvolatile Switching in Graphene Interface Controlled Memory Devices

Zuheng Wu<sup>1,2,3</sup>, Xiaolong Zhao<sup>1</sup>, Yang Yang<sup>1,2</sup>, Wei Wang<sup>1</sup>, Xumeng Zhang<sup>1,2,3</sup>, Rui  
Wang<sup>1,2,3</sup>, Rongrong Cao<sup>1,2,3</sup>, Qi Liu<sup>1,3</sup>, and Writam Banerjee<sup>1,3,4,\*</sup>

**Keywords:** resistive random access memory (RRAM), graphene, quantum conductance,  
threshold switching, ECM

**Figure S1:** Performance comparison of MS mode with re-fabricated D2 devices.

**Figure S2:** Comparison of graphene film in D2 devices.

**Figure S3:** The TS in graphene-based devices.

---

<sup>1</sup>Key Laboratory of Microelectronics Devices & Integrated Technology, Institute of Microelectronics, Chinese Academy of Sciences, No. 3, BeiTuCheng West Road, ChaoYang District, Beijing 100029, P. R. China.

<sup>2</sup>University of Chinese Academy of Sciences, No.19(A) Yuquan Road, Shijingshan District, Beijing, P.R.China 100049.

<sup>3</sup>Jiangsu National Synergetic Innovation Center for Advanced Materials (SICAM), Nanjing 210009, P. R. China.

<sup>4</sup>Department of Material Science and Engineering, Pohang University of Science and Technology (POSTECH), Pohang 790-784, Republic of Korea.

\*E-mail: writam@postech.ac.kr

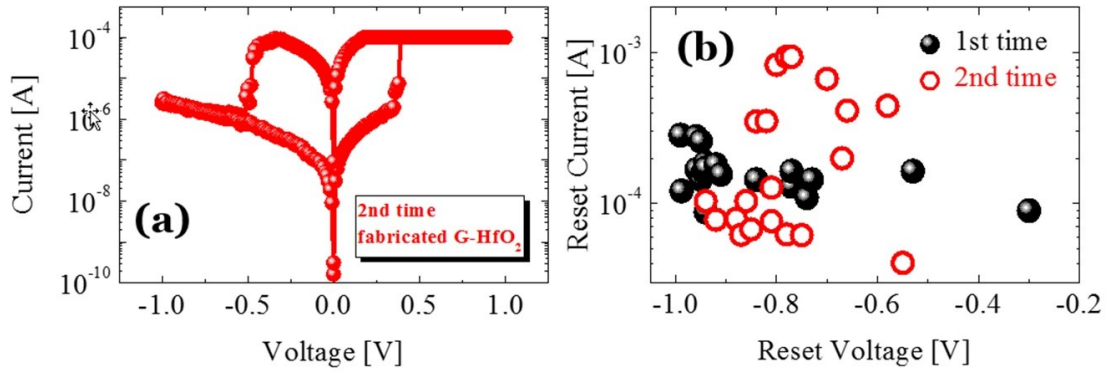

**Figure S1: Performance comparison of MS mode with re-fabricated D2 devices. (a)**

The I-V switching characteristics of the 2<sup>nd</sup>-time fabricated graphene-based D2 devices.

(b) The device-to-device variation of the reset current with reset voltage is showing symmetrical performances of the 1<sup>st</sup>-time and 2<sup>nd</sup>-time fabricated graphene-based D2 devices.

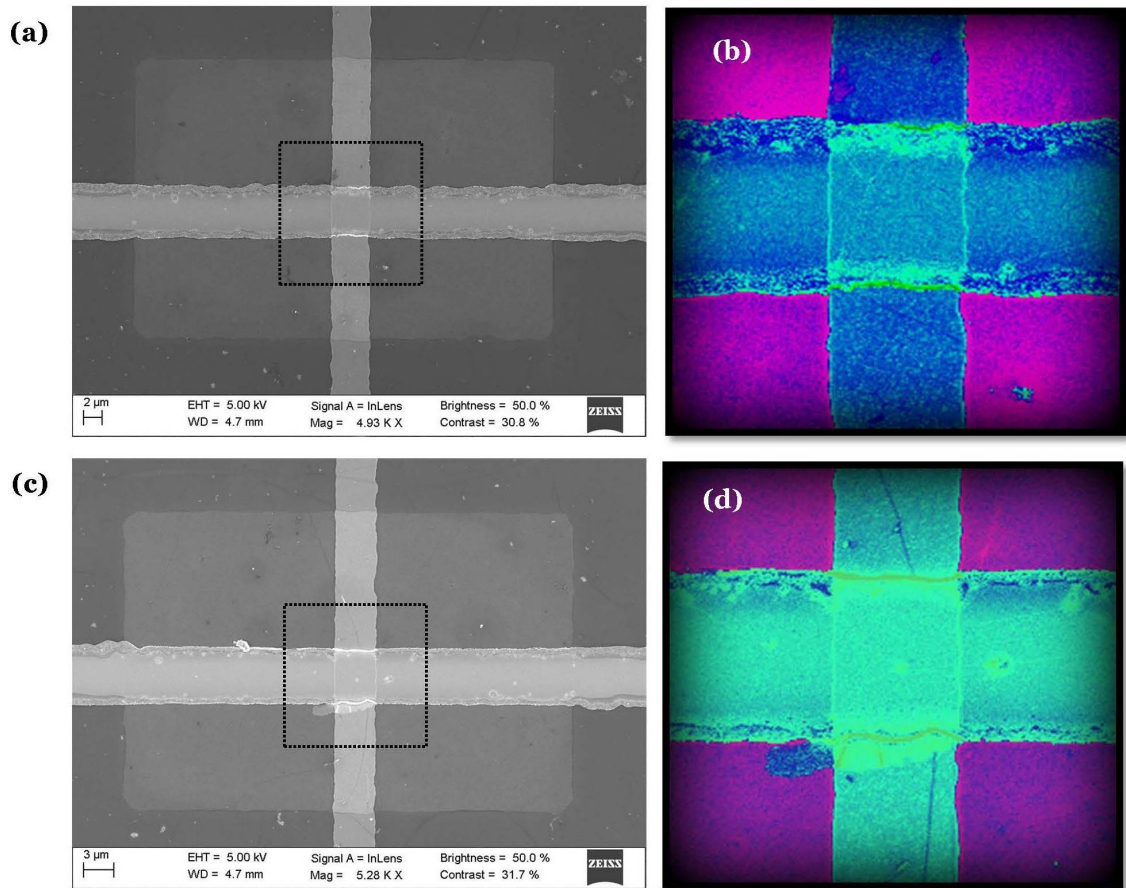

**Figure S2: Comparison of graphene film in D2 devices.** The SEM image of the D2 device (a) without and (c) with grain-boundary. Pseudo-colored SEM image of (b) a good cross-point and (d) a cross-point with prominent grain.

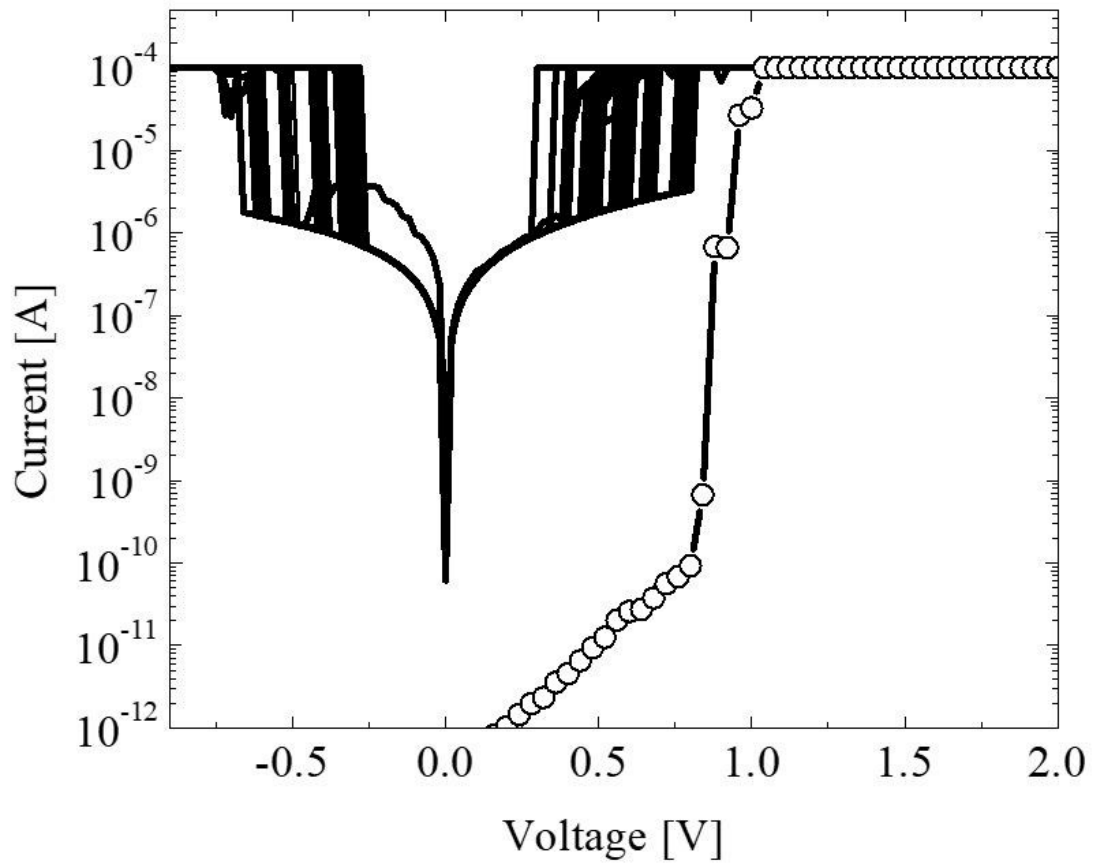

**Figure S3: The TS in graphene-based devices.** Defective graphene-barrier needed lower forming voltage  $\sim +1$  V, can introduce bi-direction TS behavior in the graphene-based devices.
